# Supplementary material
Source: Springer Nature journal article supplement (https://springermedizin.de/resource/supplementary/12885_2006_642_MOESM4_ESM.pdf/9469972)

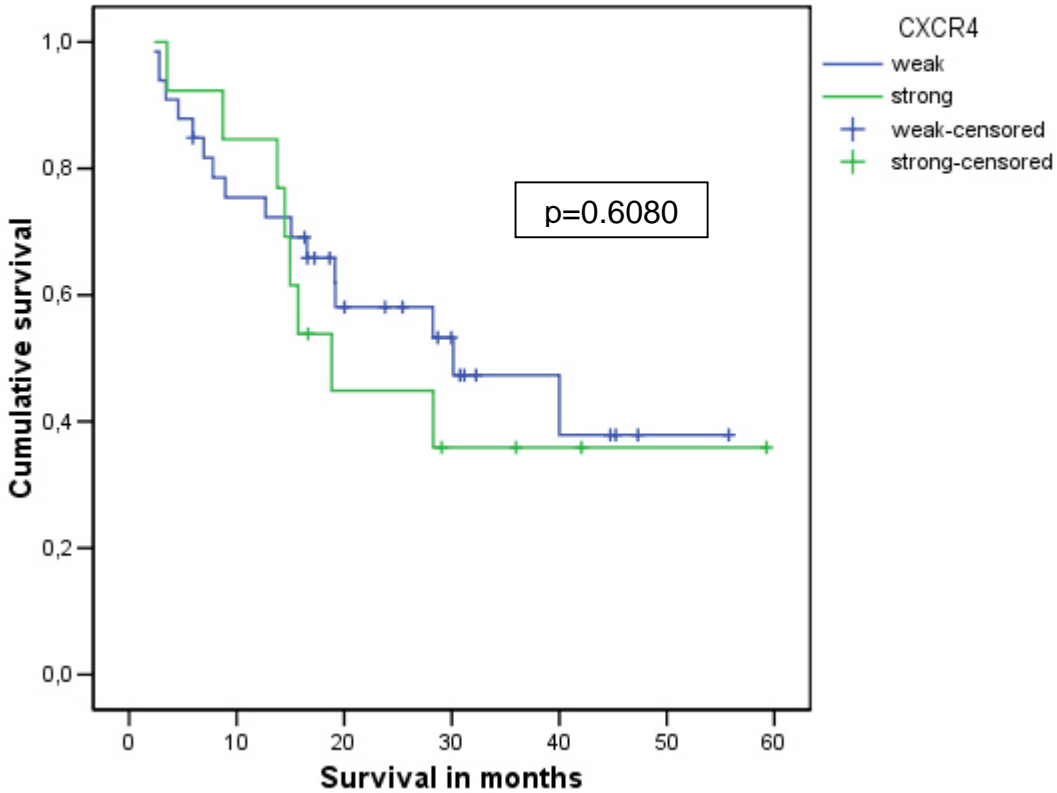

Supplement: MOESM4 [file 9469972]
